# Supplementary material for: Ipilimumab plus nivolumab for patients with metastatic uveal melanoma: a multicenter, retrospective study
Source: PubMed Central journal article supplement — J Immunother Cancer. 2020 Jun 24;8(1):e000331. doi: 10.1136/jitc-2019-000331 (PMC7319717; doi:10.1136/jitc-2019-000331), 2020-06-24
Supplement: jitc-2019-000331supp001.pdf [file jitc-2019-000331supp001.pdf]

Supplementary Figure 1: Overall survival in cohorts characterized by number of completed cycles of ipilimumab + nivolumab in mUM

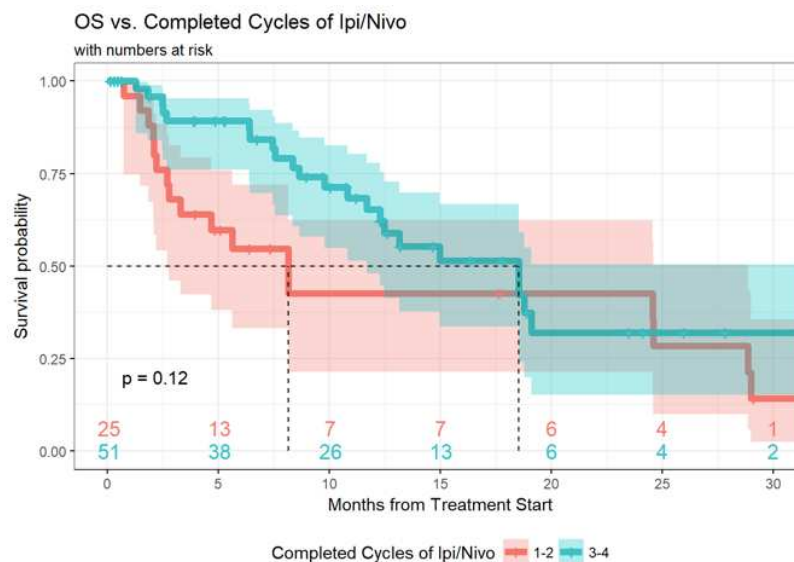

Supplementary Table 1: Participating centers in retrospective mUM cohort treated with combination ipilimumab + nivolumab

| Institution                                                 | N (%)    |
|-------------------------------------------------------------|----------|
| Memorial Sloan Kettering Cancer Center                      | 21 (24%) |
| University of California San Francisco                      | 10 (11%) |
| Moffitt Cancer Center                                       | 9 (10%)  |
| University of Washington                                    | 8 (9%)   |
| Columbia University Medical Center                          | 7 (8%)   |
| Cleveland Clinic                                            | 6 (7%)   |
| Northwestern University                                     | 5 (6%)   |
| Roswell Park Comprehensive Cancer Center                    | 5 (6%)   |
| Thomas Jefferson University (Sidney Kimmel Medical College) | 4 (4%)   |
| UPMC Hillman Cancer Center                                  | 4 (4%)   |
| University of Chicago                                       | 3 (3%)   |
| Penn State Health Milton S. Hershey Medical Center          | 3 (3%)   |
| Vanderbilt University                                       | 2 (2%)   |
| Massachusetts General Hospital                              | 2 (2%)   |
